# Supplementary material for: C-Reactive Protein Knockout Attenuates Temporomandibular Joint Inflammation in Rats
Source: Hindawi journal article supplement (doi:10.1155/2022/8613986), 2022-01-10
Supplement: f1 [file 8613986.f1.pdf]

## Supplemental Table. Primers used for RT-qPCR

| <b>Gene</b>                     | <b>Forward</b>            | <b>Reverse</b>            |
|---------------------------------|---------------------------|---------------------------|
| <b>CRP</b>                      | ATTGCCAGTCTGTAAATAAGCAA   | AATGGGAAATGGTAACATATTAATC |
| <b>TNF-<math>\alpha</math></b>  | CATCTTCTCAAATTCGAGTGACAA  | GGGAGTAGACAAGGTACAACCC    |
| <b>IL-1<math>\beta</math></b>   | CAACCAACAAGTGATATTCTCCATG | GATCCACACTCTCCAGCTGCA     |
| <b>IL-2</b>                     | CGGCACCATCCTAAACTGTGA     | GGGAGTTGCTTGTGCACTGA      |
| <b>IL-6</b>                     | CACACAGACAGCCACTCACC      | AGCTCTGGCTTGTTCTCAC       |
| <b>IL-10</b>                    | CACTGCTATGTTGCCTGCTCTTAC  | GGGTCTGGCTGACTGGGAAG      |
| <b><math>\beta</math>-actin</b> | AGCTGCGTTTTACACCCTTT      | AAGCCATGCCAATGTTGTCT      |
